# Supplementary material for: Preparation, construction and high-throughput automated analysis of human brain tissue microarrays for neurodegenerative disease drug development
Source: Springer Nature journal article supplement (doi:10.1038/s41596-021-00503-7), 2021-03-19
Supplement: MOESM1 [file 41596_2021_503_MOESM1_ESM20.xlsx]

## Sheet: results
Supplementary Table 1: Data outputs generated from Count Nuclei (grey heading), Neurite Outgrowth (Pink Heading), and Optical Density Scaled (Yellow Heading) Metamorph Journals.
Legend: These data originate from analysis of anti-HLA-DP, DQ, DR (MHC II) (clone CR3/43) protein immunoreactivity in neocerebellar cores from Huntington's disease and control cases.
The image names correspond to one of 4 acquired images per core using the Vslide TMA imaging protocol I.e case number H215, cerebellar image 1 (CB1)
Images designated as BLANKS or MISSING refer to orientation blank spaces or incomplete cores, respectively.						Please note that the University of Auckland Human Participants Ethics Committee approval numbers for the example results included here are 2008/279 and 011654
	Count Nuclei (Parameters: min width 1, max width 100, intensity 100)					Neurite Outgrowth-(Parameters: cellbody max width 20, intensity 100, min area 30) (outgrowth max width 1, intensity 15, minumum growth 0)								Optical Density (Scaled) - (Parameters: threshold range 50-1406 (total area))
Image Name	Total Nuclei	Total Area	Mean Area	Integrated Intensity	Average Intensity	Number of Cells	Total Outgrowth	Mean Outgrowth Per Cell	Total Processes	Mean Processes Per Cell	Total Branches	Mean Branches Per Cell		Thresholded Area	Average Optical density	Integrated Optical density (x1000)
H215_CB1	45	648	14.4	98869	152.576	5	13.8284	2.76569	9	1.8	1	0.2		0.839453	66.2969	86957935
H215_CB2	44	1386	31.5	225543	162.729	11	36.1421	3.28565	13	1.18182	1	0.0909091		0.834011	63.5406	82802383
H215_CB3	19	79	4.15789	12904	163.342	0	0	0	0	0	0	0		0.885272	72.3125	100025342
H215_CB4	37	1294	34.973	180222	139.275	9	31.6569	3.51743	12	1.33333	2	0.222222		0.86854	65.2398	88536428
Mean H215 CB1-CB4	36.25	851.75	21.2577	129384	154.48	6.25	20.4069	2.39219	8.5	1.07879	1	0.128283	#DIV/0!	0.856819	66.8474	89580522
H226_CB1	187	2028	10.8449	271652	133.951	15	91.2843	6.08562	35	2.33333	2	0.133333		0.888644	82.0704	113955184
H226_CB2	154	1478	9.5974	197761	133.803	13	69.8701	5.37462	24	1.84615	1	0.0769231		0.862181	77.8459	104870770
H226_CB3	95	676	7.11579	121235	179.342	4	13.8284	3.45711	5	1.25	0	0		0.887594	83.364	115614648
H226_CB4	205	2693	13.1366	359987	133.675	16	77.3848	4.83655	31	1.9375	1	0.0625		0.859599	76.847	103215026
Mean H226 CB1-CB4	160.25	1718.75	10.1737	237659	145.193	12	63.0919	4.93847	23.75	1.84175	1	0.0681891	#DIV/0!	0.874504	80.0318	109413907
H231_CB1	29	92	3.17241	19166	208.326	0	0	0	0	0	0	0		0.887103	97.2124	134746040
H231_CB2	58	166	2.86207	30015	180.813	0	0	0	0	0	0	0		0.865593	82.1884	111158876
H231_CB3	23	79	3.43478	14250	180.38	0	0	0	0	0	0	0		0.890676	94.3548	131311771
H231_CB4	49	225	4.59184	32249	143.329	1	1	1	1	1	0	0		0.878753	87.0553	119531469
Mean H231 CB1-CB4	39.75	140.5	3.51528	23920	178.212	0.25	0.25	0.25	0.25	0.25	0	0	#DIV/0!	0.880531	90.2027	124187039
H238_CB1	82	1747	21.3049	248501	142.244	14	50.799	3.6285	17	1.21429	0	0		0.876424	89.1827	122127982
H238_CB2	229	2480	10.8297	355901	143.508	15	79.4558	5.29706	29	1.93333	1	0.0666667		0.860432	100.255	134785740
H238_CB3	129	1736	13.4574	281981	162.431	11	52.799	4.79991	20	1.81818	0	0		0.886035	95.4649	132164447
H238_CB4	180	2271	12.6167	330314	145.449	17	113.355	6.66796	43	2.52941	1	0.0588235		0.868788	87.6215	118944611
Mean H238 CB1-CB4	155	2058.5	14.5522	304174	148.408	14.25	74.1023	5.09836	27.25	1.8738	0.5	0.0313725	#DIV/0!	0.87292	93.1311	127005695
H239_CB1	714	6725	9.41877	893856	132.915	37	268.167	7.24774	84	2.27027	3	0.0810811	2589	0.891131	101.115	140792210
H239_CB2	420	3788	9.01905	600212	158.451	25	166.255	6.65019	57	2.28	2	0.08	1641	0.869987	98.751	134237651
H239_CB3	118	2261	19.161	286011	126.498	14	57.3848	4.09891	23	1.64286	1	0.0714286	1645	0.883131	90.004	124195762
H239_CB4	105	1368	13.0286	193069	141.132	10	33.4853	3.34853	12	1.2	0	0	701	0.857669	86.5426	115976394
Mean H239 CB1-CB4	339.25	3535.5	12.6569	493287	139.749	21.5	131.323	5.33634	44	1.84828	1.5	0.0581274	1644	0.87548	94.1032	1.28801e+08
HC134_CB1	9	82	9.11111	13791	168.183	1	2	2	1	1	0	0	36	0.76375	71.5446	85378523
HC134_CB2	7	38	5.42857	6081	160.026	0	0	0	0	0	0	0	0	0.8823	71.344	98354334
HC134_CB3	6	55	9.16667	9196	167.2	1	1	1	1	1	0	0	38	0.890058	81.0072	112658059
HC134_CB4	10	176	17.6	26507	150.608	3	5.82843	1.94281	2	0.666667	0	0	100	0.738909	64.9631	75002846
Mean HC134 CB1-CB4	8	87.75	10.3266	13893.8	161.504	1.25	2.20711	1.2357	1	0.666667	0	0	43.5	0.818754	72.2147	9.28484e+07
HC136_CB1	106	589	5.5566	80389	136.484	2	5.82843	2.91421	2	1	0	0	142	0.875545	79.5425	108817251
HC136_CB2	322	2472	7.67702	383274	155.046	7	39.1421	5.59173	16	2.28571	0	0	309	0.872932	87.1064	118809318
HC136_CB3	35	204	5.82857	36870	180.735	1	24.4853	24.4853	5	5	1	1	37	0.883388	73.5735	101552942
HC136_CB4	234	2146	9.17094	299035	139.345	5	24.8995	4.9799	8	1.6	0	0	291	0.883009	101.108	139499003
Mean HC136 CB1-CB4	174.25	1352.75	7.05828	199892	152.903	3.75	23.5888	9.49278	7.75	2.47143	0.25	0.25	194.75	0.878718	85.3326	1.1717e+08
HC137_CB1	39	391	10.0256	51692	132.205	4	8.41421	2.10355	6	1.5	0	0		0.882529	65.077	89738105
HC137_CB2	29	238	8.2069	48572	204.084	1	2	2	2	2	0	0		0.787459	60.5552	74507355
HC137_CB3	17	124	7.29412	26828	216.355	0	0	0	0	0	0	0		0.875675	63.6384	87072717
HC137_CB4	71	798	11.2394	107818	135.11	4	8.41421	2.10355	6	1.5	0	0		0.859324	63.5947	85388123
Mean HC137 CB1-CB4	39	387.75	9.19152	58727.5	171.938	2.25	4.70711	1.55178	3.5	1.25	0	0	#DIV/0!	0.851247	63.2163	84176575
HC139_CB1	674	9307	13.8086	1295768	139.225	50	232.882	4.65765	77	1.54	5	0.1		0.890545	117.419	163386021
HC139_CB2	469	17239	36.7569	2637924	153.021	105	466.907	4.44673	175	1.66667	5	0.047619		0.846506	98.5671	130371317
HC139_CB3	1264	13949	11.0356	1879497	134.741	74	210.125	2.83953	81	1.09459	7	0.0945946		0.891279	132.683	184777319
HC139_CB4	768	7322	9.53385	1023629	139.802	32	157.912	4.93474	56	1.75	1	0.03125		0.887446	119.592	165829803
Mean HC139 CB1-CB4	793.75	11954.2	17.7837	1.7092e+06	141.697	65.25	266.956	4.21966	97.25	1.51282	4.5	0.0683659	#DIV/0!	0.878944	117.065	161091115
HC140_CB1	733	10362	14.1364	1384513	133.614	64	374.037	5.84432	139	2.17188	6	0.09375		0.891159	97.3079	135494960
HC140_CB2	251	3547	14.1315	504555	142.248	24	113.497	4.72906	33	1.375	1	0.0416667		0.877236	96.657	132485874
HC140_CB3	898	10654	11.8641	1373545	128.923	73	471.362	6.45702	156	2.13699	3	0.0410959		0.891052	98.6634	137365941
HC140_CB4	794	9820	12.3678	1407661	143.346	71	478.978	6.74616	166	2.33803	7	0.0985915		0.889008	105.438	146461459
Mean HC140 CB1-CB4	669	8595.75	13.125	1.16757e+06	137.033	58	359.469	5.94414	123.5	2.00547	4.25	0.068776	#DIV/0!	0.887114	99.5166	1.37952e+08
HC141_CB1	351	4002	11.4017	539938	134.917	29	105.527	3.63886	41	1.41379	3	0.103448		0.887973	92.0922	127774042
HC141_CB2	363	4544	12.5179	620863	136.634	32	152.497	4.76555	58	1.8125	4	0.125		0.887478	88.8419	123195639
HC141_CB3	402	4972	12.3682	678091	136.382	35	156.426	4.46933	61	1.74286	2	0.0571429		0.890929	92.8141	129204249
HC141_CB4	480	5822	12.1292	861072	147.9	49	267.752	5.46433	98	2	3	0.0612245		0.891148	92.0569	128181633
Mean HC141 CB1-CB4	399	4835	12.1042	674991	138.958	36.25	170.551	4.58452	64.5	1.74229	3	0.0867039	#DIV/0!	0.889382	91.4513	1.27089e+08
HC142_CB1	604	12929	21.4056	1904344	147.292	86	554.203	6.44422	182	2.11628	4	0.0465116		0.882372	96.3684	132863733
HC142_CB2	497	9987	20.0946	1442528	144.441	69	311.995	4.52167	123	1.78261	1	0.0144928		0.87622	87.6413	119989096
HC142_CB3	566	9436	16.6714	1370054	145.194	73	422.664	5.78992	151	2.06849	3	0.0410959		0.880073	98.5745	135551176
HC142_CB4	489	9749	19.9366	1406417	144.263	70	402.593	5.75133	130	1.85714	2	0.0285714		0.867716	87.9362	119224430
Mean HC142 CB1-CB4	539	10525.2	19.527	1.53084e+06	145.298	74.5	422.864	5.62678	146.5	1.95613	2.5	0.0326679	#DIV/0!	0.876595	92.6301	1.26907e+08
BLANK 1	0	0	0	0	0	0	0	0	0	0	0	0	0	0	0	0
BLANK 2	0	0	0	0	0	0	0	0	0	0	0	0	0	0	0	0
BLANK 3	0	0	0	0	0	0	0	0	0	0	0	0	0	0	0	0
BLANK 4	0	0	0	0	0	0	0	0	0	0	0	0	0	0	0	0
BLANK 1-4	0	0	0	0	0	0	0	0	0	0	0	0	0	0	0	0
MISSING 1	0	0	0	0	0	3	10.4142	3.4714	7	2.33333	0	0	0	0	0	0
MISSING 2	0	0	0	0	0	0	0	0	0	0	0	0	0	0	0	0
MISSING 3	0	0	0	0	0	0	0	0	0	0	0	0	0	0	0	0
MISSING 4	0	0	0	0	0	0	0	0	0	0	0	0	0	0	0	0
MISSING 1-4	0	0	0	0	0	0.75	2.60355	0.867851	1.75	0.583333	0	0	0	0	0	0
